# Supplementary material for: Prognostic Value of the Overexpression of Fatty Acid Metabolism-Related Enzymes in Squamous Cell Carcinoma of the Head and Neck
Source: PubMed Central journal article supplement (PMC7559281; doi:10.3390/ijms21186851), 2020-09-18
Supplement: ijms-21-06851-s001.pdf [file ijms-21-06851-s001.pdf]

**Table S1.** Correlations between the patients' age and clinical characteristics ( $n = 102$ ).

| Factor                            | Age <60<br>( $n = 74$ ) | Age $\geq 60$<br>( $n = 28$ ) | $p$ -value <sup>a</sup> |
|-----------------------------------|-------------------------|-------------------------------|-------------------------|
| <b>Stage I/II</b>                 |                         |                               |                         |
| n (%)                             | 17 (22.97%)             | 6 (21.43%)                    | 1.00                    |
| <b>Pretreatment fasting sugar</b> |                         |                               |                         |
| median (IQR)                      | 96.00 (90.00, 106.00)   | 100.50 (86.00, 112.00)        | 1.00                    |
| <b>Pretreatment cholesterol</b>   |                         |                               |                         |
| median (IQR)                      | 178.00 (144.00, 204.00) | 194.00 (159.00, 221.00)       | 0.54                    |
| <b>Pretreatment triglyceride</b>  |                         |                               |                         |
| median (IQR)                      | 105.00 (84.00, 136.00)  | 109.00 (83.50, 130.00)        | 0.87                    |
| <b>FAS (2~3+)</b>                 |                         |                               |                         |
| n (%)                             | 10 (13.51%)             | 4 (14.29%)                    | 1.00                    |
| <b>CPT1(3+)</b>                   |                         |                               |                         |
| n (%)                             | 14 (18.92%)             | 0 (0.00%)                     | 0.01*                   |
| <b>MCAD (3+)</b>                  |                         |                               |                         |
| n (%)                             | 24 (32.43%)             | 11 (39.29%)                   | 0.68                    |
| <b>LCAD (2~3+)</b>                |                         |                               |                         |
| n (%)                             | 13 (17.57%)             | 3 (10.71%)                    | 0.55                    |
| <b>VLCAD (2~3+)</b>               |                         |                               |                         |
| n (%)                             | 11 (14.86%)             | 3 (10.71%)                    | 0.75                    |
| <b>HADHA (3+)</b>                 |                         |                               |                         |
| n (%)                             | 6 (8.11%)               | 6 (21.43%)                    | 0.09                    |

<sup>a</sup>  $\chi^2$  test or Fisher's exact test for categorical variables / Mann-Whitney U test for continuous variables. \*  $p < 0.05$ ;  $n$ : number; IQR: interquartile range; T: tumor; N: node; FAS: fatty acid synthase; CPT1: carnitine palmitoyl transferase 1; MCAD: medium-chain acyl-CoA dehydrogenase; LCAD: long-chain acyl-CoA dehydrogenase; VLCAD: very-long-chain acyl-CoA dehydrogenase; HADHA: hydroxyacyl-CoA dehydrogenase/3-ketoacyl-CoA thiolase/enoyl-CoA hydratase.

**Table S2.** Correlations between N stage and patients' characteristics ( $n = 102$ ).

| Factor                            | Node-negative<br>( $n = 49$ ) | Node-positive<br>( $n = 53$ ) | $p$ -value <sup>a</sup> |
|-----------------------------------|-------------------------------|-------------------------------|-------------------------|
| <b>Age</b>                        |                               |                               |                         |
| median (IQR)                      | 52.70 (45.13, 60.91)          | 50.19 (45.63, 61.03)          | 0.47                    |
| <b>Pretreatment fasting sugar</b> |                               |                               |                         |
| median (IQR)                      | 95.00 (91.00, 104.00)         | 100.00 (88.00, 110.00)        | 0.32                    |
| <b>Pretreatment cholesterol</b>   |                               |                               |                         |
| median (IQR)                      | 175.00 (15.00, 202.00)        | 187.00 (154.00, 208.00)       | 0.50                    |
| <b>Pretreatment triglyceride</b>  |                               |                               |                         |
| median (IQR)                      | 107.00 (83.00, 128.00)        | 106.00 (84.00, 145.00)        | 0.81                    |
| <b>FAS (2~3+)</b>                 |                               |                               |                         |
| n (%)                             | 8 (16.33%)                    | 6 (11.32%)                    | 0.66                    |
| <b>CPT1(3+)</b>                   |                               |                               |                         |
| n (%)                             | 7 (14.29%)                    | 7 (13.21%)                    | 1.00                    |
| <b>MCAD (3+)</b>                  |                               |                               |                         |
| n (%)                             | 14 (28.57%)                   | 21 (39.62%)                   | 0.33                    |
| <b>LCAD (2~3+)</b>                |                               |                               |                         |
| n (%)                             | 5 (10.20%)                    | 11 (20.75%)                   | 0.23                    |
| <b>VLCAD (2~3+)</b>               |                               |                               |                         |
| n (%)                             | 7 (14.29%)                    | 7 (13.21%)                    | 1.00                    |
| <b>HADHA (3+)</b>                 |                               |                               |                         |
| n (%)                             | 7 (14.29%)                    | 5 (9.43%)                     | 0.65                    |

<sup>a</sup>  $\chi^2$  test or Fisher's exact test for categorical variables / Mann-Whitney U test for continuous variables. \*  $p < 0.05$ ;  $n$ : number; IQR: interquartile range; T: tumor; N: node; FAS: fatty acid synthase; CPT1: carnitine palmitoyl transferase 1; MCAD: medium-chain acyl-CoA dehydrogenase; LCAD: long-chain acyl-CoA dehydrogenase; VLCAD: very-long-chain acyl-

CoA dehydrogenase; HADHA: hydroxyacyl-CoA dehydrogenase/3-ketoacyl-CoA thiolase/enoyl-CoA hydratase.

**Table S3.** Correlations between the clinical HPV P16 and patients' characteristics ( $n = 102$ ).

| Factor                                  | P16 (-)<br>( $n = 89$ ) | P16 (+)<br>( $n = 13$ ) | $p$ -value <sup>a</sup> |
|-----------------------------------------|-------------------------|-------------------------|-------------------------|
| Age median (IQR)                        | 52.64 (45.36, 61.33)    | 51.24 (43.52, 52.28)    | 0.316                   |
| Pretreatment fasting sugar median (IQR) | 96.00 (87.00, 108.00)   | 101.00 (95.00, 105.00)  | 0.408                   |
| Pretreatment cholesterol median (IQR)   | 184.00 (152.00, 206.00) | 175.00 (154.00, 195.00) | 0.564                   |
| Pretreatment triglyceride median (IQR)  | 109.00 (84.00, 136.00)  | 95.00 (86.00, 114.00)   | 0.388                   |
| FAS (2~3+)<br>$n$ (%)                   | 11 (12.36%)             | 3 (23.08%)              | 0.381                   |
| CPT1(3+)<br>$n$ (%)                     | 14 (15.73%)             | 0 (0.00%)               | 0.206                   |
| MCAD (3+)<br>$n$ (%)                    | 32 (35.96%)             | 3 (23.08%)              | 0.534                   |
| LCAD (2~3+)<br>$n$ (%)                  | 14 (15.73%)             | 2 (15.38%)              | 1.000                   |
| VLCAD (2~3+)<br>$n$ (%)                 | 10 (11.24%)             | 4 (30.77%)              | 0.077                   |
| HADHA (3+)<br>$n$ (%)                   | 12 (13.48%)             | 0 (0.00%)               | 0.355                   |

<sup>a</sup>  $\chi^2$  test or Fisher's exact test for categorical variables / Mann-Whitney U test for continuous variables. \*  $p < 0.05$ ;  $n$ : number; IQR: interquartile range; T: tumor; N: node; FAS: fatty acid synthase; CPT1: carnitine palmitoyl transferase 1; MCAD: medium-chain acyl-CoA dehydrogenase; LCAD: long-chain acyl-CoA dehydrogenase; VLCAD: very-long-chain acyl-CoA dehydrogenase; HADHA: hydroxyacyl-CoA dehydrogenase/3-ketoacyl-CoA thiolase/enoyl-CoA hydratase; HPV: Human papillomavirus

**Table S4.** Correlations between Ki-67 expression and patients' characteristics ( $n = 102$ ).

| Factor                                  | Ki-67 < 10%<br>( $n = 94$ ) | Ki-67 $\geq$ 10%<br>( $n = 8$ ) | $p$ -value <sup>a</sup> |
|-----------------------------------------|-----------------------------|---------------------------------|-------------------------|
| Age median (IQR)                        | 51.96 (45.13, 61.03)        | 55.51 (47.72, 61.07)            | 0.467                   |
| Pretreatment fasting sugar median (IQR) | 96.00 (88.00, 106.00)       | 100.50 (88.00, 126.00)          | 0.588                   |
| Pretreatment cholesterol median (IQR)   | 182.00 (150.00, 206.00)     | 179.00 (156.00, 190.50)         | 0.746                   |
| Pretreatment triglyceride median (IQR)  | 106.50 (84.00, 132.00)      | 102.00 (80.00, 208.50)          | 0.990                   |
| FAS (2~3+)<br>$n$ (%)                   | 13 (13.83)                  | 1 (12.50)                       | 1.000                   |
| CPT1(3+)<br>$n$ (%)                     | 13 (13.83)                  | 1 (12.50)                       | 1.000                   |
| MCAD (3+)<br>$n$ (%)                    | 33 (35.11)                  | 2 (25.00)                       | 0.712                   |
| LCAD (2~3+)<br>$n$ (%)                  | 13 (13.83)                  | 3 (37.50)                       | 0.109                   |
| VLCAD (2~3+)<br>$n$ (%)                 | 11 (11.70)                  | 3 (37.50)                       | 0.077                   |
| HADHA (3+)<br>$n$ (%)                   | 12 (12.77)                  | 0 (0.00)                        | 0.591                   |

<sup>a</sup>  $\chi^2$  test or Fisher's exact test for categorical variables / Mann-Whitney U test for continuous variables. \*  $p < 0.05$ ;  $n$ : number; IQR: interquartile range; T: tumor; N: node; FAS: fatty acid synthase; CPT1: carnitine palmitoyl transferase 1; MCAD: medium-chain acyl-CoA dehydrogenase; LCAD: long-chain acyl-CoA dehydrogenase; VLCAD: very-long-chain acyl-

CoA dehydrogenase; HADHA: hydroxyacyl-CoA dehydrogenase/3-ketoacyl-CoA  
thiolase/enoyl-CoA hydratase.
